# Supplementary material for: The role of oceanic ventilation and terrestrial outflow in atmospheric non-methane hydrocarbons over the Chinese marginal seas
Source: Copernicus journal article supplement (doi:10.5194/acp-24-8721-2024), 2024-08-08
Supplement: Supplementary file 1 [file acp-24-8721-2024-supplement.pdf]

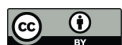

*Supplement of*

## **The role of oceanic ventilation and terrestrial outflow in atmospheric non-methane hydrocarbons over the Chinese marginal seas**

**Jian Wang et al.**

*Correspondence to:* Honghai Zhang ([honghaizhang@ouc.edu.cn](mailto:honghaizhang@ouc.edu.cn))

The copyright of individual parts of the supplement might differ from the article licence.

**Table S1** Precision and detection limit of the analytical method for different gases

| Species   | Precision (%) | Detection limit (ppt) | Species                         | Precision (%) | Detection limit (ppt) |
|-----------|---------------|-----------------------|---------------------------------|---------------|-----------------------|
| Ethane    | 5             | 3.0                   | DMS                             | 5             | 3.0                   |
| Ethylene  | 4             | 1.0                   | Benzene                         | 5             | 20                    |
| Propane   | 7             | 3.0                   | Ethylbenzene                    | 4             | 14                    |
| Propylene | 7             | 0.5                   | Toluene                         | 3             | 15                    |
| i-butane  | 6             | 1.0                   | CFC-11                          | 1             | 5.0                   |
| n-butane  | 5             | 1.0                   | CHBr <sub>3</sub>               | 7             | 0.03                  |
| n-pentane | 6             | 2.0                   | CH <sub>2</sub> Br <sub>2</sub> | 6             | 0.04                  |
| i-pentane | 7             | 2.0                   | CH <sub>3</sub> I               | 2             | 0.1                   |
| Isoprene  | 4             | 1.0                   |                                 |               |                       |

**Table S2** Parameters for inlet, oven, and detector of the gas chromatography

| Parameters                                | Setting                                                                                                                                                                           |
|-------------------------------------------|-----------------------------------------------------------------------------------------------------------------------------------------------------------------------------------|
| Inlet temperature                         | 150 °C                                                                                                                                                                            |
| Temperature program                       | 45 °C for 3.5 mins; increase to 120 °C with a rate of 10 °C min <sup>-1</sup> and hold for 15 mins; increase to 170 °C with a rate of 30 °C min <sup>-1</sup> and hold for 3 mins |
| Flow rate of carrier gas                  | N <sub>2</sub> : 2.0 mL min <sup>-1</sup>                                                                                                                                         |
| Split ratio                               | 5:1                                                                                                                                                                               |
| Detector temperature                      | 300 °C                                                                                                                                                                            |
| Flow rate of the combustion/auxiliary gas | H <sub>2</sub> : 30 mL min <sup>-1</sup> ; air: 400 mL min <sup>-1</sup>                                                                                                          |
| Flow rate of exhaust gas purge            | N <sub>2</sub> : 60 mL min <sup>-1</sup>                                                                                                                                          |

**Table S3** Precision and detection limit of the analytical method for seawater non-methane hydrocarbons (NMHCs)

| NMHCs     | Precision (%) | Detection limit (pmol L <sup>-1</sup> ) |
|-----------|---------------|-----------------------------------------|
| Ethane    | 6             | 1.0                                     |
| Ethylene  | 4             | 0.7                                     |
| Propane   | 4             | 0.7                                     |
| Propylene | 3             | 0.5                                     |
| i-butane  | 6             | 0.5                                     |
| n-butane  | 5             | 0.8                                     |
| Isoprene  | 3             | 0.5                                     |

**Table S4** Information for urban air samples collection and concentrations of atmospheric non-methane hydrocarbons (NMHCs)

| City     | Latitude<br>(N) | Longitude<br>(E) | Date      | Time<br>(UTC+8) | Ethane | Propane | i-butane | n-butane | Ethylene | Propylene | Isoprene |
|----------|-----------------|------------------|-----------|-----------------|--------|---------|----------|----------|----------|-----------|----------|
| Tianjin  | 38.96           | 117.71           | 2021/3/27 | 09:00           | 5.39   | 20.08   | 27.57    | 30.24    | 0.283    | 0.065     | 0.025    |
| Tianjin  | 38.96           | 117.71           | 2021/3/27 | 23:00           | 5.72   | 7.70    | 2.31     | 6.56     | 0.186    | 0.121     | 0.015    |
| Dongying | 37.40           | 118.89           | 2021/3/28 | 09:00           | 3.48   | 2.36    | 0.43     | 1.05     | 0.390    | 0.029     | 0.007    |
| Dongying | 37.40           | 118.89           | 2021/3/28 | 23:00           | 3.47   | 2.40    | 0.43     | 1.04     | 0.389    | 0.033     | 0.008    |
| Qingdao  | 36.09           | 120.34           | 2021/3/28 | 09:00           | 1.63   | 0.63    | 0.03     | 0.11     | 0.101    | 0.007     | 0.006    |
| Qingdao  | 36.09           | 120.34           | 2021/3/28 | 23:00           | 1.41   | 0.44    | BD       | 0.02     | 0.035    | BD        | 0.007    |
| Ningbo   | 29.99           | 122.23           | 2021/3/28 | 09:00           | 2.65   | 1.98    | 0.69     | 0.79     | 0.200    | 0.019     | 0.009    |
| Ningbo   | 29.99           | 122.23           | 2021/3/28 | 23:00           | 2.62   | 3.06    | 3.20     | 3.84     | 0.390    | 0.130     | 0.023    |
| Xiamen   | 24.45           | 118.08           | 2021/3/27 | 09:00           | 1.31   | 0.25    | 0.03     | 0.02     | 0.050    | BD        | 0.025    |
| Shenzhen | 22.53           | 114.05           | 2021/3/28 | 09:00           | 1.62   | 1.52    | 0.86     | 1.85     | 0.102    | 0.016     | 0.177    |
| Shenzhen | 22.53           | 114.05           | 2021/3/28 | 23:00           | 0.83   | 0.15    | 0.01     | 0.08     | 0.092    | 0.018     | 0.008    |
| Qinzhou  | 21.87           | 108.61           | 2021/3/29 | 09:00           | 0.95   | 0.15    | 0.13     | 0.05     | 0.101    | 0.006     | 0.076    |
| Sanya    | 18.39           | 109.02           | 2021/4/1  | 09:00           | 0.28   | 0.22    | 0.08     | 0.15     | 0.077    | 0.023     | 0.014    |
| Sanya    | 18.39           | 109.02           | 2021/4/1  | 23:00           | 0.34   | 0.43    | 0.23     | 0.32     | 0.122    | 0.040     | 0.250    |

BD: below the detection limit

12  
13  
14  
15  
16  
17  
18  
19  
20  
21  
22  
23  
24  
25  
26  
27  
28  
29  
30  
31  
32  
33  
34  
35  
36  
37  
38  
39  
40  
41  
42  
43  
44  
45  
46  
47  
48  
49  
50  
51  
52  
53  
54  
55  
56  
57  
58  
59  
60  
61

**Table S5** Information for oceanic air samples collection and concentrations of non-methane hydrocarbons (NMHCs) in oceanic atmosphere

| Station | Latitude<br>(N) | Longitude<br>(E) | Date      | Time<br>(UTC+8) | Ethane | Propane | i-butane | n-butane | Ethylene | Propylene | Isoprene |
|---------|-----------------|------------------|-----------|-----------------|--------|---------|----------|----------|----------|-----------|----------|
| (ppb)   |                 |                  |           |                 |        |         |          |          |          |           |          |
| E1      | 31.35           | 122.6            | 2021/4/26 | 20:09           | 0.969  | 0.236   | 0.018    | 0.025    | 0.083    | 0.023     | 0.0051   |
| E2      | 31.3            | 126.49           | 2021/4/27 | 20:33           | 0.815  | 0.195   | BD       | 0.036    | 0.11     | 0.038     | 0.0163   |
| E3      | 30.04           | 122.71           | 2021/4/29 | 18:09           | 1.723  | 1.571   | 0.403    | 0.511    | 0.199    | 0.034     | 0.0056   |
| E4      | 29.32           | 122.38           | 2021/4/29 | 23:33           | 1.471  | 1.215   | 0.384    | 0.424    | 0.143    | 0.03      | 0.0039   |
| E5      | 28.78           | 123.09           | 2021/4/30 | 5:32            | 1.114  | 0.587   | 0.092    | 0.108    | 0.101    | 0.025     | 0.0129   |
| E6      | 29.27           | 125.43           | 2021/4/28 | 7:40            | 0.686  | 0.226   | BD       | 0.035    | 0.05     | 0.049     | 0.0177   |
| E7      | 27.88           | 121.33           | 2021/5/1  | 18:26           | 1.67   | 1.787   | 0.806    | 0.694    | 0.295    | 0.036     | 0.0016   |
| E8      | 27.46           | 124.97           | 2021/4/30 | 19:10           | 1.076  | 0.443   | 0.078    | 0.086    | 0.142    | 0.038     | 0.0055   |
| E9      | 26.57           | 120.96           | 2021/5/2  | 5:19            | 1.505  | 1.297   | 0.289    | 0.461    | 0.133    | 0.03      | 0.0432   |
| E10     | 26.03           | 121.75           | 2021/5/2  | 12:17           | 0.99   | 0.437   | 0.063    | 0.082    | 0.076    | 0.022     | 0.003    |
| H1      | 39.51           | 123.9            | 2021/4/20 | 15:12           | 1.23   | 0.439   | 0.54     | 0.082    | 0.13     | 0.031     | 0.0036   |
| H2      | 38.75           | 122.99           | 2021/4/20 | 11:20           | 0.702  | 1.7     | BD       | 0.447    | 0.028    | 0.034     | 0.0133   |
| H3      | 37.99           | 122.04           | 2021/4/19 | 17:20           | 1.58   | 1.197   | 1.168    | 0.596    | 0.253    | 0.029     | 0.0061   |
| H4      | 37.95           | 123.91           | 2021/4/21 | 6:05            | 1.448  | 0.318   | 0.194    | 0.045    | 0.075    | 0.023     | BD       |
| H5      | 35.03           | 123.03           | 2021/4/24 | 12:15           | 1.255  | 0.654   | 0.229    | 0.222    | 0.244    | 0.06      | 0.0022   |
| H6      | 33.95           | 121.85           | 2021/4/25 | 9:39            | 1.007  | 0.361   | 0.189    | 0.091    | 0.129    | 0.03      | 0.0016   |
| H7      | 34.02           | 123.79           | 2021/4/25 | 1:22            | 1.276  | 0.816   | 0.233    | 0.259    | 0.286    | 0.037     | 0.0134   |
| H8      | 32.99           | 122.98           | 2021/4/27 | 9:16            | 1.355  | 0.804   | 0.139    | 0.203    | 0.123    | 0.023     | 0.0007   |
| H9      | 32.43           | 123.84           | 2021/4/26 | 8:06            | 1.072  | 0.332   | 0.05     | 0.056    | 0.152    | 0.034     | 0.0035   |

BD: below the detection limit

62  
63  
64  
65  
66  
67  
68  
69  
70  
71  
72  
73  
74  
75  
76  
77  
78  
79  
80  
81  
82  
83  
84  
85  
86  
87  
88  
89  
90  
91  
92  
93  
94  
95  
96  
97  
98  
99  
100  
101  
102  
103  
104  
105  
106  
107  
108  
109  
110  
111

**Table S6** Atmospheric non-methane hydrocarbons (NMHCs) from different reports

| Region                                | Ethane | Propane | i-butane | n-butane | Ethylene | Propylene | Isoprene | Reference         |
|---------------------------------------|--------|---------|----------|----------|----------|-----------|----------|-------------------|
| The Yellow Sea and the East China Sea | 1.24   | 0.822   | 0.283    | 0.256    | 0.151    | 0.033     | 0.008    | This study        |
| Bengal Bay                            | 0.561  | 0.191   | 0.107    | 0.143    | 0.299    | 0.192     | ND       | Sahu et al., 2011 |
| Bengal Bay                            | 0.861  | 0.093   | 0.040    | 0.156    | 0.099    | 0.059     | ND       | Sahu et al., 2011 |
| Northwest Pacific Ocean               | 0.61   | 0.24    | 0.12     | 0.07     | 0.42     | 0.60      | ND       | Li et al., 2019   |

ND: No data.

112  
113  
114  
115  
116  
117  
118  
119  
120  
121  
122  
123  
124  
125  
126  
127  
128  
129  
130  
131  
132  
133  
134  
135  
136  
137  
138  
139  
140  
141  
142  
143  
144  
145  
146  
147  
148  
149  
150  
151  
152  
153  
154  
155  
156  
157  
158  
159  
160  
161

**Table S7** Information for seawater samples and concentrations of non-methane hydrocarbons (NMHCs)

| Station | Latitude (N) | Longitude (E) | Date      | Time (UTC+8) | Ethane | Propane | i-butane | n-butane | Ethylene | Propylene | Isoprene |
|---------|--------------|---------------|-----------|--------------|--------|---------|----------|----------|----------|-----------|----------|
| E1      | 31.35        | 122.6         | 2021/4/26 | 20:32        | 9.11   | 6.69    | 9.81     | BD       | 80.8     | 26.2      | 31.9     |
| E2      | 31.3         | 126.49        | 2021/4/27 | 20:57        | 11.7   | 11.5    | 2.79     | BD       | 109      | 13.4      | 22.5     |
| E3      | 30.04        | 122.71        | 2021/4/29 | 18:22        | 22.8   | 32.3    | 6.17     | 10.38    | 136      | 27.6      | 105      |
| E4      | 29.32        | 122.38        | 2021/4/29 | 23:50        | 11     | 15.7    | 14.4     | BD       | 66.2     | 14.4      | 59.7     |
| E5      | 28.78        | 123.09        | 2021/4/30 | 5:55         | 7.83   | 3.76    | 1.54     | BD       | 8.4      | 2.42      | 3.43     |
| E7      | 27.88        | 121.33        | 2021/5/1  | 18:40        | 14.4   | 18.9    | 20.4     | BD       | 69.6     | 20.8      | 44.9     |
| E8      | 27.46        | 124.97        | 2021/4/30 | 19:42        | 10.5   | 6.9     | 4.33     | BD       | 89.9     | 8.29      | 17.3     |
| E9      | 26.57        | 120.96        | 2021/5/2  | 5:44         | 15.6   | 14.5    | 18       | 1.44     | 62.5     | 18        | 51.3     |
| E10     | 26.03        | 121.75        | 2021/5/2  | 12:42        | 4.7    | 3.68    | 2.76     | BD       | 17.9     | 6.43      | 7.6      |
| H2      | 38.75        | 122.99        | 2021/4/20 | 11:41        | 13.3   | 22      | 2.92     | 32.92    | 79       | 27        | 10       |
| H3      | 37.99        | 122.04        | 2021/4/19 | 17:41        | 13.6   | 17.1    | 3.41     | 18.85    | 59.4     | 16.7      | 26.3     |
| H4      | 37.95        | 123.91        | 2021/4/21 | 6:31         | 13     | 10.1    | 35.3     | 0.56     | 115      | 19.8      | 17.9     |
| H5      | 35.03        | 123.03        | 2021/4/24 | 12:36        | 11.3   | 10.9    | 4.86     | 15.03    | 87.9     | 11.4      | 36.1     |
| H6      | 33.95        | 121.85        | 2021/4/25 | 9:58         | 8.4    | 10.7    | 9.52     | BD       | 35.8     | 8.43      | 19.4     |
| H7      | 34.02        | 123.79        | 2021/4/25 | 1:47         | 7.96   | 7.94    | 5.91     | BD       | 54.8     | 6.37      | 20.5     |
| H9      | 32.43        | 123.84        | 2021/4/26 | 8:41         | 10.1   | 9.4     | 9.22     | BD       | 55.2     | 15.5      | 22.1     |

BD: below the detection limit

162  
163  
164  
165  
166  
167  
168  
169  
170  
171  
172  
173  
174  
175  
176  
177  
178  
179  
180  
181  
182  
183  
184  
185  
186  
187  
188  
189  
190  
191  
192  
193  
194  
195  
196  
197  
198  
199  
200  
201  
202  
203  
204  
205  
206  
207  
208  
209  
210  
211

**Table S8** Surface seawater temperature (SST), wind speed(u), and sea-to-air flux of non-methane hydrocarbons (NMHCs) for oceanic stations

| Station | SST<br>(°C) | u<br>(m s <sup>-1</sup> ) | Ethane | Propane | i-butane | n-butane<br>(nmol m <sup>-2</sup> d <sup>-1</sup> ) | Ethylene | Propylene | Isoprene |
|---------|-------------|---------------------------|--------|---------|----------|-----------------------------------------------------|----------|-----------|----------|
| E1      | 17          | 11.6                      | 73.9   | 50.5    | 71.4     | -0.6                                                | 737.1    | 211.9     | 227.3    |
| E2      | 19.6        | 7.8                       | 47     | 43.2    | 9.8      | -0.3                                                | 489.3    | 52.7      | 78.5     |
| E3      | 19.3        | 8.9                       | 118.3  | 157.4   | 27.8     | 46.8                                                | 774.7    | 138.9     | 468.2    |
| E4      | 18.4        | 10.6                      | 76.8   | 104.4   | 90.4     | -0.5                                                | 517.1    | 99.2      | 365.6    |
| E5      | 19.5        | 12.7                      | 81.5   | 35.6    | 14.2     | -0.8                                                | 89.8     | 23.3      | 31       |
| E7      | 20.7        | 5.5                       | 29.6   | 36.7    | 37.1     | -0.1                                                | 158.2    | 42        | 79.9     |
| E8      | 22          | 9.9                       | 70.8   | 43.4    | 26       | -0.5                                                | 681.6    | 54.7      | 102.2    |
| E9      | 20.4        | 4.2                       | 18.3   | 15.9    | 18.7     | 1.4                                                 | 80.8     | 20.7      | 52       |
| E10     | 25          | 6.1                       | 12.3   | 9.1     | 6.7      | -0.2                                                | 53.4     | 17.2      | 18.2     |
| H2      | 12.4        | 4.3                       | 13.1   | 20.5    | 2.5      | 28.7                                                | 86.1     | 26.1      | 8.5      |
| H3      | 14.6        | 1.7                       | 2.3    | 2.7     | 0.5      | 2.8                                                 | 11       | 2.7       | 3.8      |
| H4      | 9.2         | 9.8                       | 60.8   | 44.1    | 146      | 2                                                   | 594.6    | 90.7      | 72.3     |
| H5      | 13.3        | 11.5                      | 81.8   | 73.5    | 31       | 96.1                                                | 706      | 80.5      | 226.3    |
| H6      | 13.6        | 4.6                       | 9.8    | 11.9    | 10       | -0.1                                                | 46.5     | 9.7       | 20       |
| H7      | 14.4        | 0.7                       | 0.2    | 0.2     | 0.1      | ND                                                  | 1.7      | 0.2       | 0.5      |
| H9      | 15.5        | 5.5                       | 17.9   | 15.7    | 14.7     | -0.1                                                | 109.4    | 27.2      | 34.4     |

212  
213  
214  
215  
216  
217  
218  
219  
220  
221  
222  
223  
224  
225  
226  
227  
228  
229  
230  
231  
232  
233  
234  
235  
236  
237  
238  
239  
240  
241  
242  
243  
244  
245  
246  
247  
248  
249  
250  
251  
252  
253  
254  
255  
256  
257  
258  
259  
260  
261



**Table S9** Distance from station to nearest land (L), transport time of air mass from it leaving the land to the station (t), and retention of air mass over the land (R<sub>L</sub>)

| <b>Station</b> | <b>L<br/>(km)</b> | <b>t<br/>(hour)</b> | <b>R<sub>L-48</sub></b> | <b>R<sub>L-72</sub></b> | <b>R<sub>L-96</sub></b> | <b>R<sub>L-mean</sub></b> |
|----------------|-------------------|---------------------|-------------------------|-------------------------|-------------------------|---------------------------|
| E1             | 68.34             | 19                  | 0.19                    | 0.39                    | 0.51                    | 0.36                      |
| E2             | 330.99            | 44                  | 0.07                    | 0.07                    | 0.16                    | 0.58                      |
| E3             | 29.19             | 11                  | 0.79                    | 0.86                    | 0.89                    | 0.10                      |
| E4             | 40.28             | 20                  | 0.75                    | 0.82                    | 0.86                    | 0.85                      |
| E5             | 113.85            | 14                  | 0.61                    | 0.72                    | 0.78                    | 0.81                      |
| E6             | 298.68            | 15                  | 0.29                    | 0.27                    | 0.23                    | 0.70                      |
| E7             | 13.86             | 12                  | 0.78                    | 0.84                    | 0.88                    | 0.26                      |
| E8             | 319.87            | 38                  | 0.52                    | 0.64                    | 0.72                    | 0.83                      |
| E9             | 69.24             | 49                  | 0.14                    | 0.11                    | 0.16                    | 0.62                      |
| E10            | 83.10             | 46                  | 0.56                    | 0.56                    | 0.63                    | 0.14                      |
| H1             | 34.64             | 20                  | 0.29                    | 0.47                    | 0.53                    | 0.58                      |
| H2             | 33.43             | 22                  | 0.35                    | 0.53                    | 0.63                    | 0.43                      |
| H3             | 48.09             | 4                   | 0.94                    | 0.96                    | 0.97                    | 0.50                      |
| H4             | 61.65             | 81                  | 0                       | 0                       | 0.09                    | 0.96                      |
| H5             | 199.84            | 26                  | 0.25                    | 0.27                    | 0.4                     | 0.03                      |
| H6             | 124.22            | 30                  | 0.17                    | 0.14                    | 0.27                    | 0.31                      |
| H7             | 119.51            | 33                  | 0.11                    | 0.1                     | 0.13                    | 0.19                      |
| H8             | 158.65            | 42                  | 0.06                    | 0.26                    | 0.4                     | 0.11                      |
| H9             | 197.59            | 39                  | 0.23                    | 0.43                    | 0.54                    | 0.24                      |

**Table S10** Sea-to-air fluxes of non-methane hydrocarbons (NMHCs) in different studies

| Region                        | Ethane                                  | Propane   | i-butane  | n-butane  | Ethylene  | Propylene | Isoprene  | Reference              |
|-------------------------------|-----------------------------------------|-----------|-----------|-----------|-----------|-----------|-----------|------------------------|
|                               | (mmol m <sup>-2</sup> d <sup>-1</sup> ) |           |           |           |           |           |           |                        |
| Yellow Sea and East China Sea | 44.6                                    | 41.5      | 31.7      | 10.9      | 321       | 56.1      | 112       | This study             |
| Yellow Sea and East China Sea | 31.7±27.8                               | 29.7±25.1 | 18.5±16.4 | 15.9±19.1 | 240±258   | 67.9±74.5 | 52.4±82.3 | Wu et al., 2021        |
| East China Sea                | 12.5±14.4                               | 17.9±40.9 | 4.1±5.3   | 8.5±10.3  | 65.0±73.4 | 22.4±26.8 | 54.2±67.0 | Li et al., 2021        |
| Marginal seas of China        | -                                       | -         | -         | -         | 529       | 383       | 111       | Li et al., 2021        |
| North Sea                     | 20.4                                    | 17.2      | 4.31      | -         | 145       | 57.4      | 24.4      | Broadgate et al., 1997 |
| 23-38°N Atlantic Ocean        | 28.7                                    | 21.5      | 2.87      | 5.74      | 315       | 103       | -         | Tran et al., 2013      |
| Western Pacific Ocean         | 6.6                                     | 12.4      | -         | -         | 74.7      | 24.1      | 43.4      | Li et al., 2019        |
| Northwest Pacific Ocean       | 28.0                                    | 21.1      | 12.7      | 14.2      | 65.2      | 48.7      | 41.7      | Wu et al., 2023        |

“-” indicates no data.

263  
264  
265  
266  
267  
268  
269  
270  
271  
272  
273  
274  
275  
276  
277  
278  
279  
280  
281  
282  
283  
284  
285  
286  
287  
288  
289  
290  
291  
292  
293  
294  
295  
296  
297  
298  
299  
300  
301  
302  
303  
304  
305  
306  
307  
308  
309  
310  
311  
312

**Table S11** Parameters and results of ozone formation potential (OFP) and secondary organic aerosol formation potential ( $P_{SOAP}$ ) for non-methane hydrocarbons (NMHCs)

| Species   | Mean conc. of NMHCs (ppb) | MIR ( $\text{gO}_3\text{gVOC}^{-1}$ ) | SOAP | M ( $\text{g mol L}^{-1}$ ) | OFP ( $\mu\text{g m}^{-3}$ ) |                   |                 |                                  |                       | $P_{SOAP}$ ( $\mu\text{g m}^{-3}$ ) |                 |                                  |  |  |
|-----------|---------------------------|---------------------------------------|------|-----------------------------|------------------------------|-------------------|-----------------|----------------------------------|-----------------------|-------------------------------------|-----------------|----------------------------------|--|--|
|           |                           |                                       |      |                             | Industrial activities        | Exhaust emissions | Ocean emissions | Terrestrial vegetation emissions | Industrial activities | Exhaust emissions                   | Ocean emissions | Terrestrial vegetation emissions |  |  |
| Ethane    | 1.21                      | 0.28                                  | 0.1  | 30.07                       | 0.17                         | 0.16              | 0.08            | 0.02                             | 0.03                  | 0.03                                | 0.02            | 0.01                             |  |  |
| Propane   | 0.769                     | 0.49                                  | -    | 44.1                        | 0.51                         | 0.10              | 0.05            | 0.04                             | -                     | -                                   | -               | -                                |  |  |
| i-butane  | 0.288                     | 1.23                                  | -    | 58.12                       | 0.52                         | 0.04              | 0.01            | 0.03                             | -                     | -                                   | -               | -                                |  |  |
| n-butane  | 0.234                     | 1.15                                  | 0.3  | 58.12                       | 0.60                         | 0.04              | 0               | 0.04                             | 0.08                  | 0.01                                | 0               | 0.01                             |  |  |
| Ethylene  | 0.145                     | 9.00                                  | 1.3  | 28.05                       | 0.47                         | 0.46              | 0.45            | 0                                | 0.04                  | 0.04                                | 0.04            | 0                                |  |  |
| Propylene | 0.033                     | 1.66                                  | 1.6  | 42.08                       | 0.05                         | 0.03              | 0.03            | 0.02                             | 0.01                  | 0.02                                | 0.02            | 0.01                             |  |  |
| Isoprene  | 0.008                     | 10.61                                 | 1.9  | 68.12                       | 0.01                         | 0.02              | 0.02            | 0.12                             | 0.01                  | 0.01                                | 0.01            | 0.01                             |  |  |

313  
314  
315  
316  
317  
318  
319  
320  
321  
322  
323  
324  
325  
326

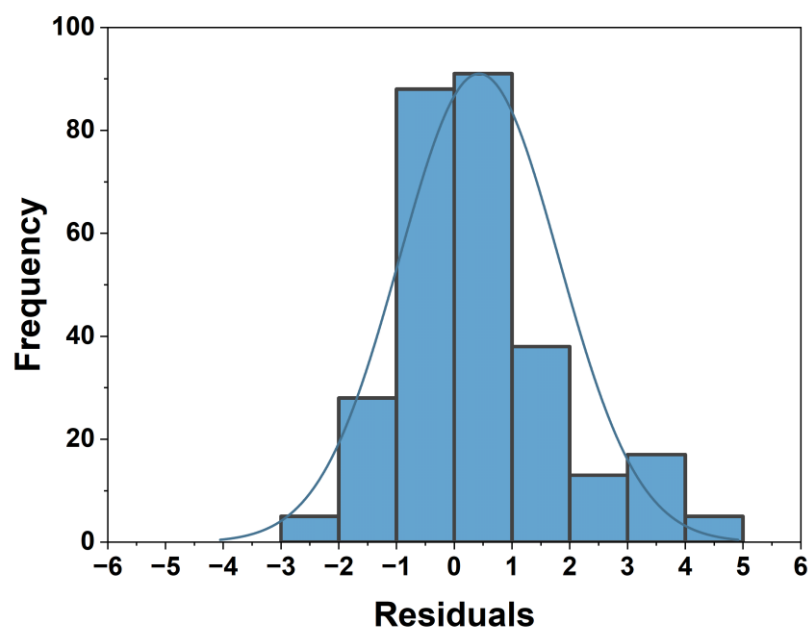

328

329

330

**Figure S1** The scaled residuals given by positive matrix factorization (PMF).

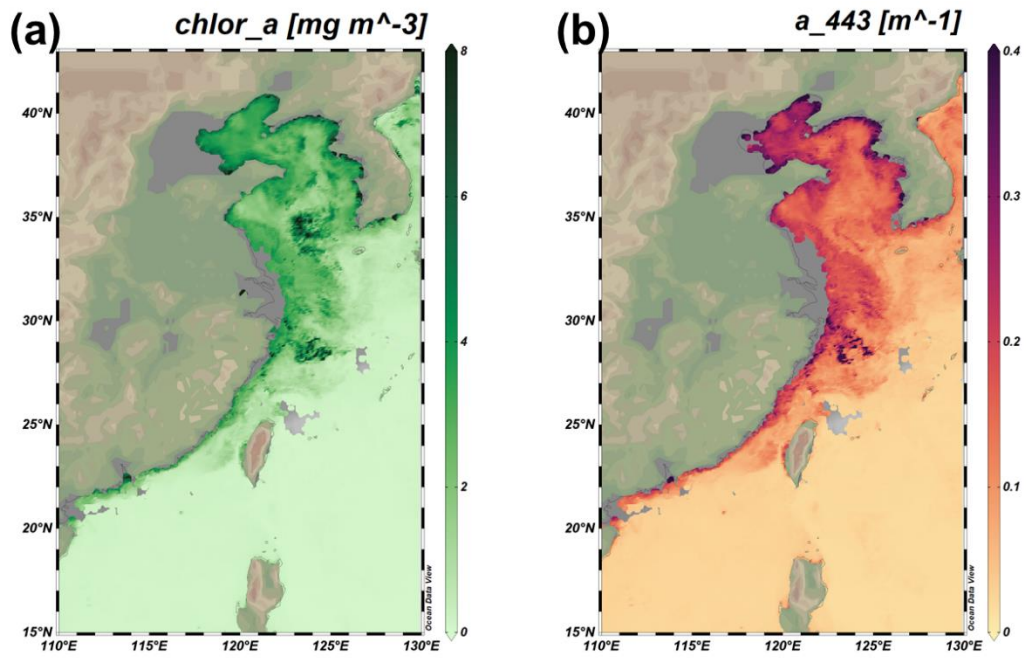

331

332

333 **Figure S2** Romte sensing monthly Chl-*a* concentration (panel a) and total absorption coefficient at 443 nm (panel

334 b) in April 2021. Data of Aqua-MODIS at resolution of 9 km were downloaded from

335 <https://oceancolor.gsfc.nasa.gov/> (Schlitzer, Reiner, Ocean Data View, odv.awi.de, 2023).

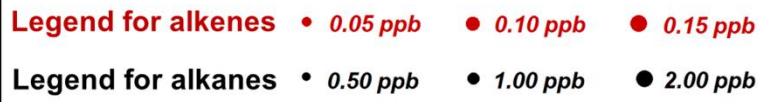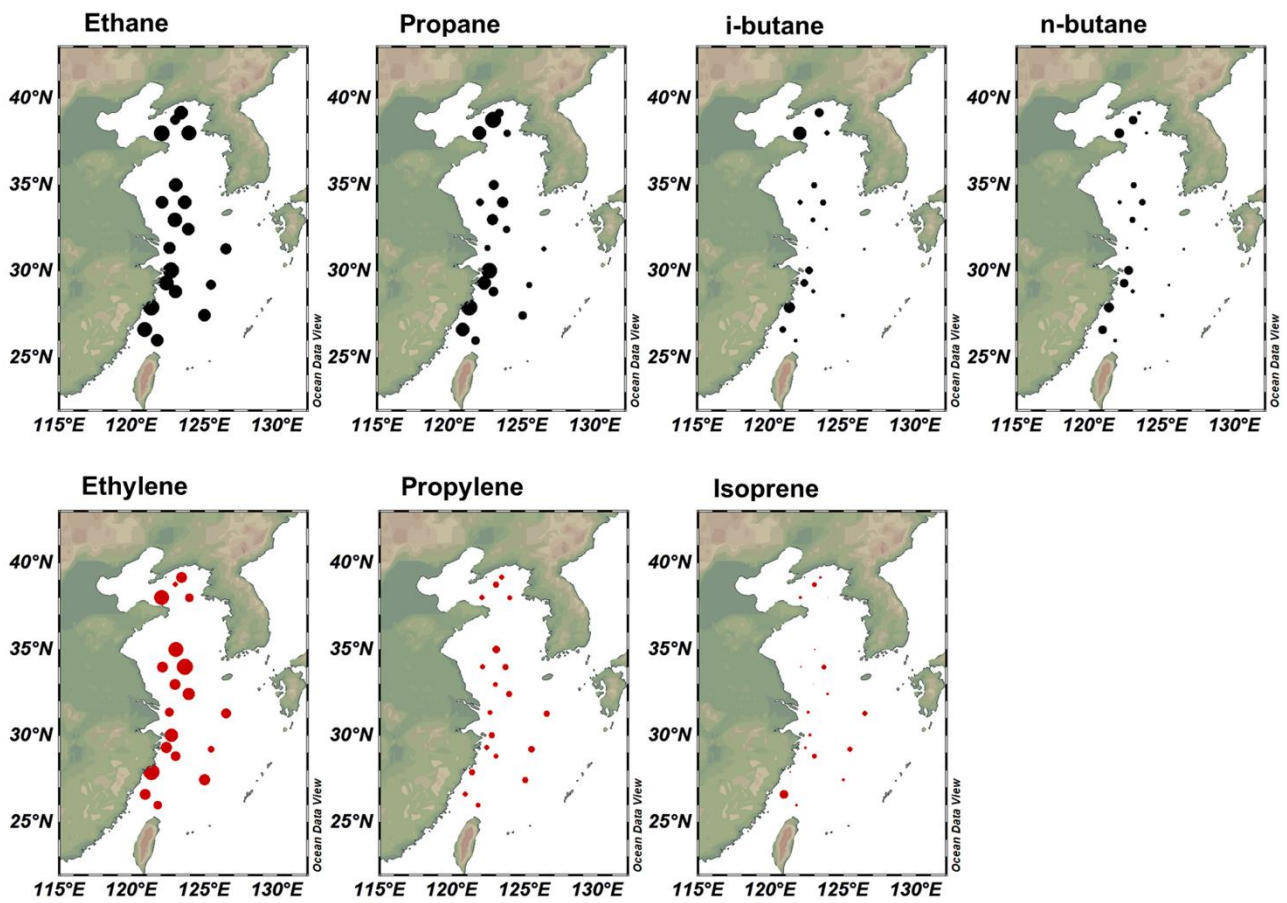

336

337

**Figure S3** Distributions of alkanes (black dots) and alkenes (red dots) in the atmosphere over the Yellow Sea and

338

the East China Sea (Schlitzer, Reiner, Ocean Data View, odv.awi.de, 2024).

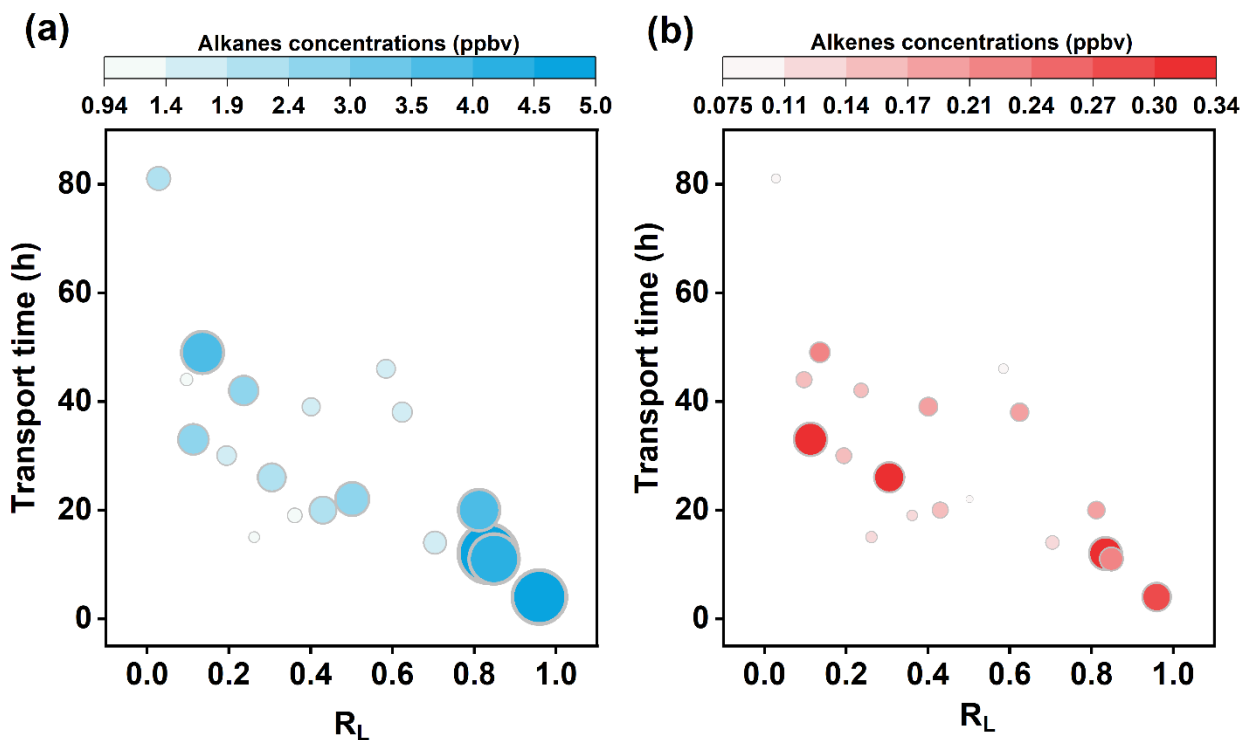

339

340

**Figure S4** Impacts of air mass (indicated by transport time and  $R_L$ ) on atmospheric alkanes (a) and alkenes (b) over the Yellow Sea and the East China Sea.

341

342

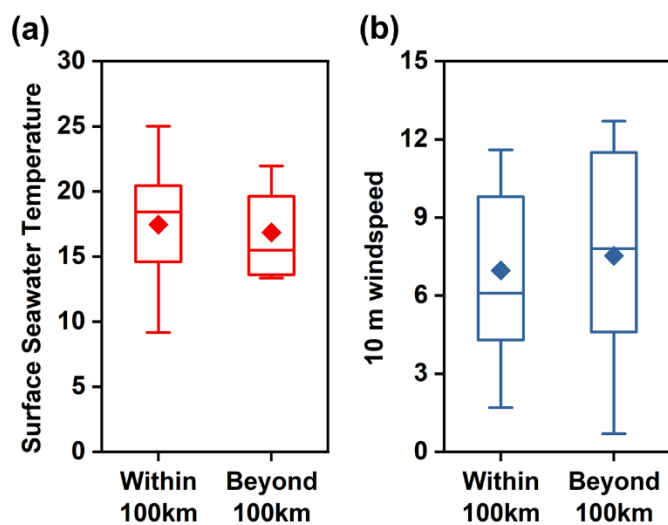

343

344

345

346

**Figure S5** Comparison in surface seawater temperature (panel a) and wind speed (panel b) between regions within/beyond 100 km from the coastline. Boxes span the interquartile range, with lines at the median. Diamonds indicate mean values, and whiskers span the 5-95 percentiles.

347
